# Supplementary material for: Loss-of-function HSD17B13 variants, non-alcoholic steatohepatitis and adverse liver outcomes: Results from a multi-ethnic Asian cohort
Source: PubMed Central journal article supplement — Clin Mol Hepatol. 2021 Feb 23;27(3):486–98. doi: 10.3350/cmh.2020.0162 (PMC8273635; doi:10.3350/cmh.2020.0162), 2021-02-23
Supplement: cmh-2020-0162-suppl3.pdf [file cmh-2020-0162-suppl3.pdf]

**Supplementary Table 2.** Comparison of clinical characteristics and baseline histological parameters between *HSD17B13* rs72613567 genotypes among 223 biopsy-proven NAFLD patients

| Characteristic             | NAFLD (n=223) |             |              | P-value |
|----------------------------|---------------|-------------|--------------|---------|
|                            | T/T (n=133)   | T/TA (n=72) | TA/TA (n=18) |         |
| Age (years)                | 55.2±12.1     | 56.2±12.2   | 56.1±16.3    | 0.644   |
| Gender                     |               |             |              | 0.151   |
| Male                       | 76 (57.1)     | 31 (43.1)   | 10 (55.6)    |         |
| Female                     | 57 (42.9)     | 41 (56.9)   | 8 (44.4)     |         |
| Ethnicity                  |               |             |              | 0.016   |
| Malay                      | 59 (44.4)     | 43 (59.7)   | 11 (61.1)    |         |
| Chinese                    | 36 (27.1)     | 18 (25.0)   | 7 (38.9)     |         |
| Indian                     | 38 (28.6)     | 11 (15.3)   | 0 (0.0)      |         |
| BMI (kg/m <sup>2</sup> )   | 29.2±4.7      | 28.7±4.6    | 29.2±4.8     | 0.854   |
| HbA1c (%)                  | 6.5±1.5       | 6.5±1.3     | 6.7±2.2      | 0.958   |
| Total cholesterol (mmol/L) | 5.1±1.2       | 5.2±1.0     | 4.8±1.1      | 0.211   |
| Triglyceride (mmol/L)      | 1.7±0.6       | 1.8±0.8     | 1.6±0.6      | 0.929   |
| HDL (mmol/L)               | 1.2±0.3       | 1.3±0.3     | 1.2±0.4      | 0.047   |
| LDL (mmol/L)               | 3.2±1.1       | 3.2±0.9     | 2.8±1.0      | 0.264   |
| ALT (U/L)                  | 85.4±50.7     | 73.2±34.7   | 85.2±56.9    | 0.547   |
| AST (U/L)                  | 46.8±27.4     | 42.8±19.8   | 47.4±35.2    | 0.894   |
| GGT (U/L)                  | 102.4±102.0   | 117.9±121.8 | 95.3±64.0    | 0.817   |
| Steatosis grade            | 1.8±0.7       | 2.2±0.8     | 2.1±0.8      | 0.057   |
| Lobular inflammation       | 1.4±0.6       | 1.4±0.6     | 1.4±0.5      | 0.854   |
| Hepatocyte ballooning      | 1.1±0.6       | 1.0±0.7     | 1.2±0.7      | 0.464   |
| Fibrosis                   | 1.4±1.0       | 1.4±1.1     | 1.7±1.2      | 0.759   |

Values are presented as mean±standard deviation or number (%).

All *P*-values were obtained using Kruskal-Wallis test. Significance was assumed when *P*<0.05.

*HSD17B13*, 17β-hydroxysteroid dehydrogenase 13; NAFLD, non-alcoholic fatty liver disease; BMI, body mass index; HbA1c, haemoglobin A1c; HDL, high-density lipoprotein; LDL, low-density lipoprotein; ALT, alanine aminotransferase; AST, aspartate aminotransferase; GGT, gamma-glutamyl transferase.
