# Supplementary material for: Loss-of-function HSD17B13 variants, non-alcoholic steatohepatitis and adverse liver outcomes: Results from a multi-ethnic Asian cohort
Source: PubMed Central journal article supplement — Clin Mol Hepatol. 2021 Feb 23;27(3):486–98. doi: 10.3350/cmh.2020.0162 (PMC8273635; doi:10.3350/cmh.2020.0162), 2021-02-23
Supplement: cmh-2020-0162-suppl5.pdf [file cmh-2020-0162-suppl5.pdf]

**Supplementary Table 4.** Association of *HSD17B13* rs72613567 TA allele and rs6834314 G allele with baseline histological features among 223 biopsy-proven NAFLD patients

| Histology                 | Univariate <i>P</i> -value* | Multivariate <i>P</i> -value <sup>†</sup> |
|---------------------------|-----------------------------|-------------------------------------------|
| rs72613567 TA allele      |                             |                                           |
| Steatosis                 | 0.057                       | 0.069                                     |
| Lobular inflammation      | 0.982                       | 0.949                                     |
| Hepatocellular ballooning | 0.127                       | 0.219                                     |
| Fibrosis                  | 0.499                       | 0.931                                     |
| rs6834314 G allele        |                             |                                           |
| Steatosis                 | 0.052                       | 0.065                                     |
| Lobular inflammation      | 0.558                       | 0.412                                     |
| Hepatocellular ballooning | 0.104                       | 0.277                                     |
| Fibrosis                  | 0.977                       | 0.443                                     |

*HSD17B13*, 17 $\beta$ -hydroxysteroid dehydrogenase 13; NAFLD, non-alcoholic fatty liver disease.

\**P*-values were obtained using Jonckheere-Terpstra test. Significance was assumed when  $P < 0.05$ .

<sup>†</sup>*P*-values were obtained using Ordinal regression. Significance was assumed when  $P < 0.05$ .
