# Supplementary material for: Loss-of-function HSD17B13 variants, non-alcoholic steatohepatitis and adverse liver outcomes: Results from a multi-ethnic Asian cohort
Source: PubMed Central journal article supplement — Clin Mol Hepatol. 2021 Feb 23;27(3):486–98. doi: 10.3350/cmh.2020.0162 (PMC8273635; doi:10.3350/cmh.2020.0162), 2021-02-23
Supplement: cmh-2020-0162-suppl9.pdf [file cmh-2020-0162-suppl9.pdf]

**Supplementary Table 8.** Association of *HSD17B13* rs72613567 and rs6834314 genotypes with clinical outcomes by Cox regression analysis in different genetic models

| Genetic model                 | Genotype   | Univariate analysis |         | Multivariate analysis |         |
|-------------------------------|------------|---------------------|---------|-----------------------|---------|
|                               |            | HR (95% CI)         | P-value | HR (95% CI)           | P-value |
| rs72613567                    |            |                     |         |                       |         |
| At least one clinical outcome |            |                     |         |                       |         |
| Dominant                      | T/TA-TA/TA | 2.01 (0.99–4.07)    | 0.052   | 1.77 (0.86–3.64)      | 0.122   |
| Co-dominant                   | T/TA       | 1.86 (0.86–4.01)    | 0.115   | 1.68 (0.77–3.65)      | 0.191   |
| Co-dominant                   | TA/TA      | 2.37 (0.89–6.26)    | 0.083   | 1.96 (0.65–5.92)      | 0.235   |
| Recessive                     | TA/TA      | 1.91 (0.78–4.66)    | 0.154   | 1.51 (0.55–4.14)      | 0.426   |
| Liver-related outcome         |            |                     |         |                       |         |
| Dominant                      | T/TA-TA/TA | 0.61 (0.11–3.31)    | 0.563   | 0.06 (0.003–1.43)     | 0.083   |
| Co-dominant                   | T/TA       | 0.42 (0.05–3.77)    | 0.439   | 0.11 (0.01–2.13)      | 0.145   |
| Co-dominant                   | TA/TA      | 1.16 (0.13–10.44)   | 0.897   | 0.002 (0.00–1.23)     | 0.048   |
| Recessive                     | TA/TA      | 1.42 (0.17–12.25)   | 0.749   | 0.02 (0.00–1.25)      | 0.064   |
| CVS outcome                   |            |                     |         |                       |         |
| Dominant                      | T/TA-TA/TA | 2.34 (0.98–5.58)    | 0.055   | 2.77 (1.15–6.69)      | 0.204   |
| Co-dominant                   | T/TA       | 2.26 (0.89–5.72)    | 0.087   | 3.81 (1.40–10.34)     | 0.009   |
| Co-dominant                   | TA/TA      | 2.36 (0.71–7.91)    | 0.163   | 1.46 (0.40–5.32)      | 0.568   |
| Recessive                     | TA/TA      | 1.79 (0.60–5.31)    | 0.296   | 1.18 (0.38–3.71)      | 0.773   |
| Extrahepatic malignancy       |            |                     |         |                       |         |
| Dominant                      | T/TA-TA/TA | 5.18 (0.58–46.41)   | 0.141   | 4.11 (0.44–38.02)     | 0.214   |
| Co-dominant                   | T/TA       | 5.15 (0.54–49.53)   | 0.156   | 21.83 (0.41–1,153.47) | 0.128   |
| Co-dominant                   | TA/TA      | 4.98 (0.31–80.38)   | 0.258   | 8.82 (0.23–342.21)    | 0.243   |
| Recessive                     | TA/TA      | 2.09 (0.23–18.84)   | 0.510   | 0.61 (0.03–11.49)     | 0.738   |
| All-cause mortality           |            |                     |         |                       |         |
| Dominant                      | T/TA-TA/TA | 2.38 (0.44–13.00)   | 0.318   | 1.14 (0.17–7.90)      | 0.880   |
| Co-dominant                   | T/TA       | 2.48 (0.41–14.82)   | 0.321   | 4.90 (0.44–54.25)     | 0.196   |
| Co-dominant                   | TA/TA      | 1.85 (0.17–20.40)   | 0.616   | Inf (NA)              | 0.334   |
| Recessive                     | TA/TA      | 1.40 (0.16–12.01)   | 0.762   | 0.01 (0.00–0.62)      | 0.029   |
| rs6834314                     |            |                     |         |                       |         |
| At least one clinical outcome |            |                     |         |                       |         |
| Dominant                      | A/G-G/G    | 1.80 (0.89–3.64)    | 0.104   | 1.49 (0.72–3.09)      | 0.282   |
| Co-dominant                   | A/G        | 1.79 (0.85–3.77)    | 0.123   | 1.57 (0.74–3.33)      | 0.245   |
| Co-dominant                   | G/G        | 1.76 (0.57–5.42)    | 0.324   | 1.19 (0.32–4.42)      | 0.791   |
| Recessive                     | G/G        | 1.37 (0.48–3.91)    | 0.560   | 0.86 (0.26–2.86)      | 0.801   |
| Liver-related outcome         |            |                     |         |                       |         |
| Dominant                      | A/G-G/G    | 1.12 (0.23–5.55)    | 0.890   | 0.28 (0.03–2.25)      | 0.229   |
| Co-dominant                   | A/G        | 0.97 (0.16–5.79)    | 0.971   | 0.43 (0.05–3.46)      | 0.425   |
| Co-dominant                   | G/G        | 1.60 (0.16–15.49)   | 0.688   | 0.004 (0.00–1.56)     | 0.070   |
| Recessive                     | G/G        | 1.62 (0.19–13.95)   | 0.662   | 0.02 (0.00–1.25)      | 0.064   |
| CVS outcome                   |            |                     |         |                       |         |
| Dominant                      | A/G-G/G    | 1.44 (0.62–3.33)    | 0.395   | 1.59 (0.68–3.73)      | 0.286   |

**Supplementary Table 8.** Continued

| Genetic model           | Genotype | Univariate analysis |         | Multivariate analysis |         |
|-------------------------|----------|---------------------|---------|-----------------------|---------|
|                         |          | HR (95% CI)         | P-value | HR (95% CI)           | P-value |
| Co-dominant             | A/G      | 1.53 (0.64–3.67)    | 0.345   | 2.00 (0.80–5.00)      | 0.137   |
| Co-dominant             | G/G      | 1.06 (0.23–4.85)    | 0.943   | 0.89 (0.19–4.15)      | 0.880   |
| Recessive               | G/G      | 0.92 (0.21–3.95)    | 0.911   | 0.64 (0.15–2.83)      | 0.555   |
| Extrahepatic malignancy |          |                     |         |                       |         |
| Dominant                | A/G-G/G  | 4.69 (0.52–41.99)   | 0.167   | 3.36 (0.36–31.09)     | 0.285   |
| Co-dominant             | A/G      | 4.45 (0.46–42.79)   | 0.196   | 10.49 (0.44–248.81)   | 0.146   |
| Co-dominant             | G/G      | 5.63 (0.35–91.17)   | 0.224   | 7.72 (0.20–301.97)    | 0.275   |
| Recessive               | G/G      | 2.47 (0.27–22.27)   | 0.421   | 0.62 (0.03–12.11)     | 0.755   |
| All-cause mortality     |          |                     |         |                       |         |
| Dominant                | A/G-G/G  | 5.56 (0.65–47.58)   | 0.117   | 2.85 (0.30–26.99)     | 0.360   |
| Co-dominant             | A/G      | 5.80 (0.65–51.90)   | 0.116   | 22.62 (0.55–930.41)   | 0.100   |
| Co-dominant             | G/G      | 4.06 (0.25–64.84)   | 0.322   | Inf (NA)              | 0.924   |
| Recessive               | G/G      | 1.58 (0.18–13.61)   | 0.677   | 0.01 (0.00–0.63)      | 0.029   |

Inf (NA) represented number was too large to be recorded.

*HSD17B13*, 17 $\beta$ -hydroxysteroid dehydrogenase 13; HR, hazard ratio; CI, confidence interval; CVS, cardiovascular; NA, not available.
